# Supplementary material
Source: Springer Nature journal article supplement (https://www.springermedizin.de/resource/supplementary/12943_2009_666_MOESM1_ESM.pdf/9554522)

**A**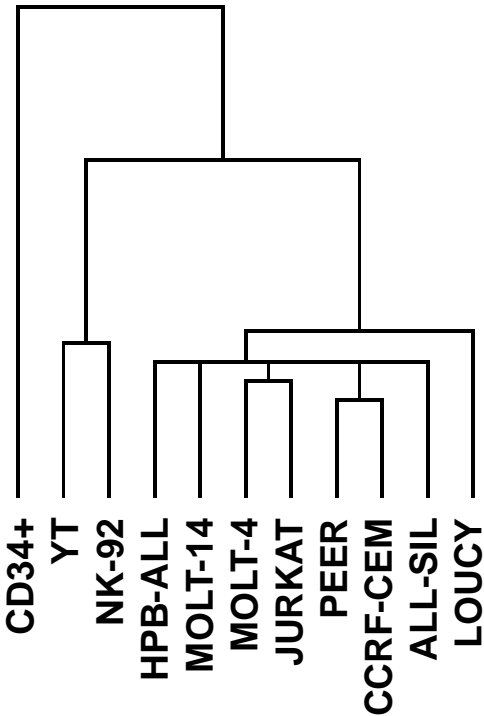**B**

top/down 200

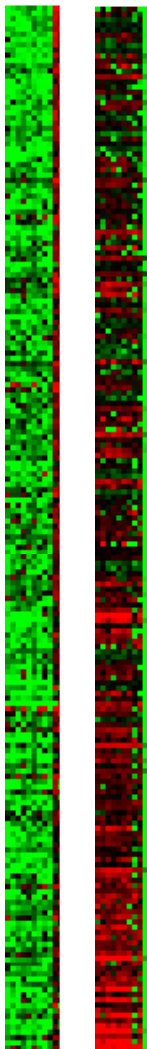

top/down 200: selected genes

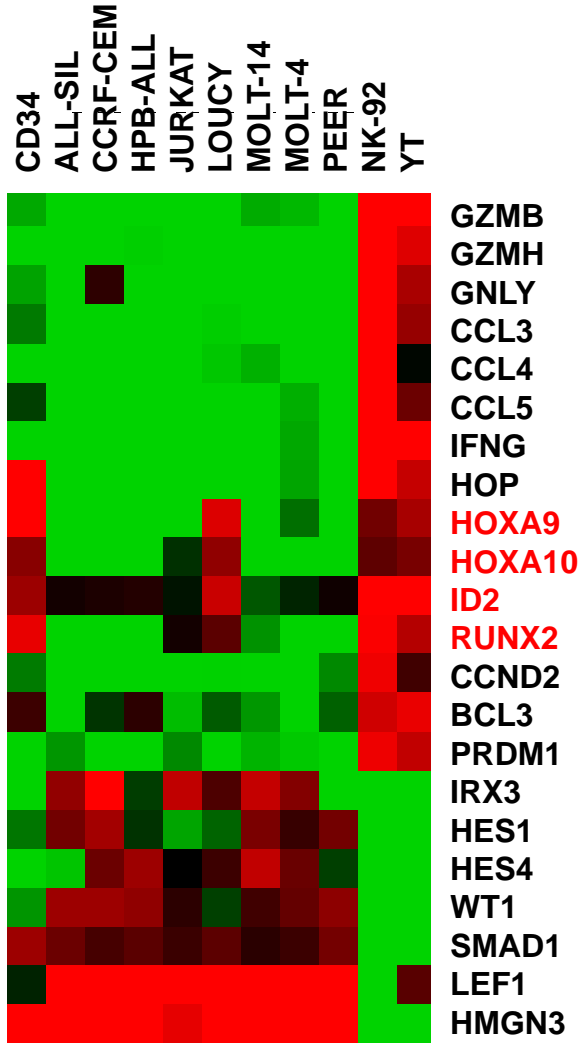

Supplement: MOESM1 [file 9554522]
